# Supplementary material for: Urotensin II Protects Cardiomyocytes from Apoptosis Induced by Oxidative Stress through the CSE/H2S Pathway
Source: PubMed Central journal article supplement (PMC4490456; doi:10.3390/ijms160612482), 2015-06-03
Supplement: ijms-16-12482-s001.pdf [file ijms-16-12482-s001.pdf]

## Supplementary Information

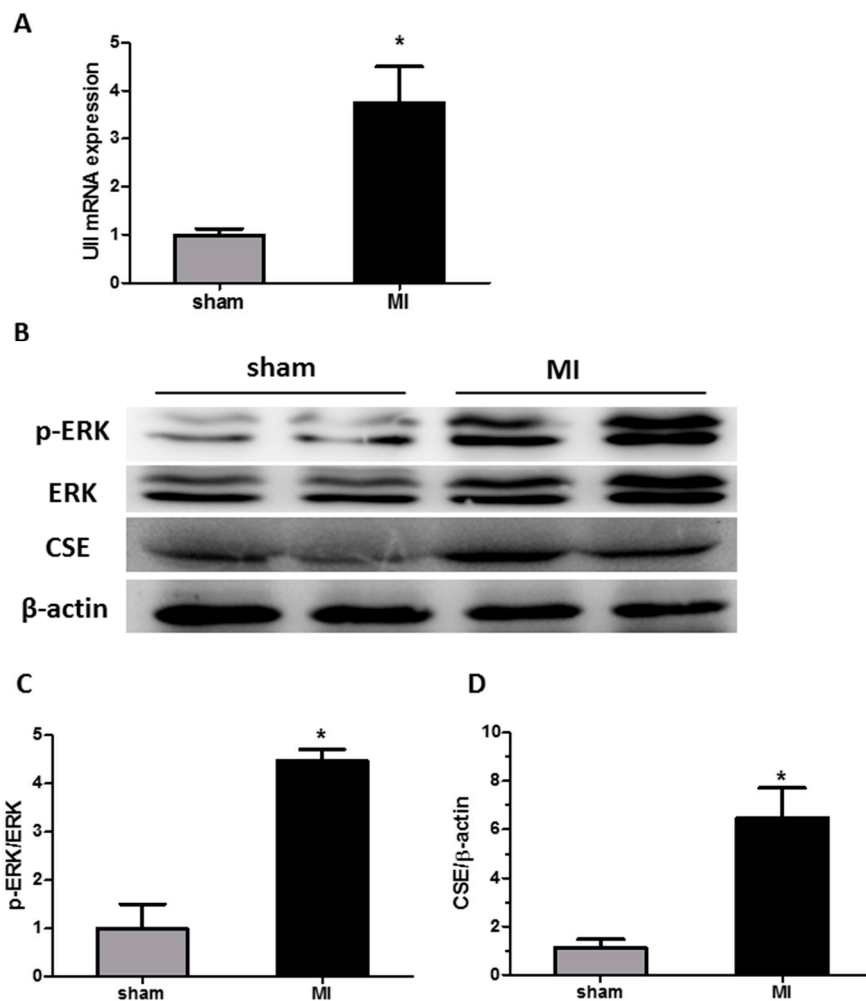

**Figure S1.** The expressions of UII mRNA, p-ERK and CSE were analyzed in left ventricle tissues at 2 days after myocardial infarction. **(A)** Real-time PCR analysis of UII mRNA level; **(B)** The representative picture of p-ERK and CSE expression by western blot analysis; **(C)** Quantitative analysis of p-ERK expression by western blot analysis; **(D)** Quantitative analysis of CSE expression by western blot analysis. Sham: sham operation ( $n = 4$ ). MI: myocardial infarction ( $n = 4$ ). \*  $p < 0.05$  vs. sham group.

### Supplementary Methods

#### *Myocardial Infarction Model of Mouse*

Myocardial infarction model of mice was established as previous study [2]. C57BL/6 mice (8–10 weeks) were subjected to occlusion by an 8-0 silk on the top of the left anterior descending artery or sham operation after anesthetized with ketamine and artificially ventilated with a respirator. The ischemia injury was identified by discoloration of left ventricle and electrocardiogram. At 2 days after surgery, the whole hearts were excised, and snap frozen over liquid nitrogen for subsequent western blot analysis.

*Real-Time Polymerase Chain Reaction (RT-PCR)*

Total RNAs were extracted from heart tissue as described in “Experimental Section”, Real-Time PCR was performed with Power SYBR Green PCR Master Mix (TaKaRa, Otsu, Japan) and analyzed by the iCycler System (Bio-Rad, Hercules, CA, USA). The primers were used for real-time PCR: UII, forward primer: AACATAAGCAACACGGGGCT; Reverse primer: AAGGCGTCGTTAGCGTGATT. GAPDH, forward primer: GGTGAAGGTCGGTGTGAACGGATT, Reverse primer: AATGCCAAA GTTGTCATGGATGACC.

Relative levels of UII mRNA expression were normalized to the GAPDH mRNA expression by using the comparative  $C_t$  method.
